# Supplementary material for: Autoimmunity gene IRGM suppresses cGAS‐STING and RIG‐I‐MAVS signaling to control interferon response
Source: PubMed Central journal article supplement (PMC7507369; doi:10.15252/embr.202050051), 2020-07-27
Supplement: EMBR-21-e50051-s001.pdf [file EMBR-21-e50051-s001.pdf]

**Title: Autoimmunity Gene IRGM Suppresses cGAS-STING and RIG-I-MAVS Signaling to control Interferon Response**

Table of content:

| Content            | Page Number |
|--------------------|-------------|
| Appendix Figure S1 | 2           |
| Appendix Figure S2 | 3           |
| Appendix Figure S3 | 4           |
| Appendix Figure S4 | 5           |
| Appendix Figure S5 | 6           |
| Appendix Table S1  | 7-8         |

# Appendix Figure S1

**A**

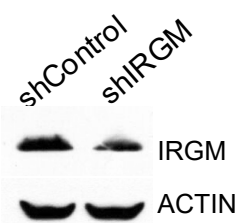

**B**

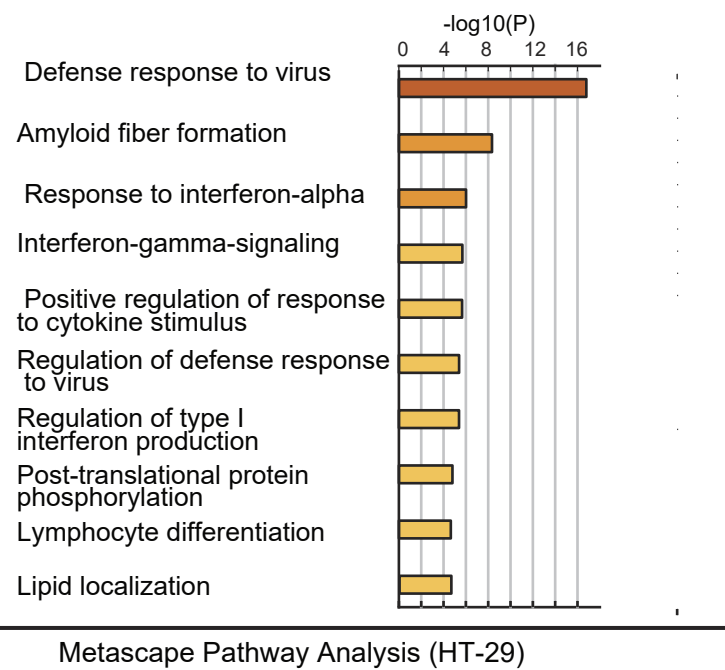

**D**

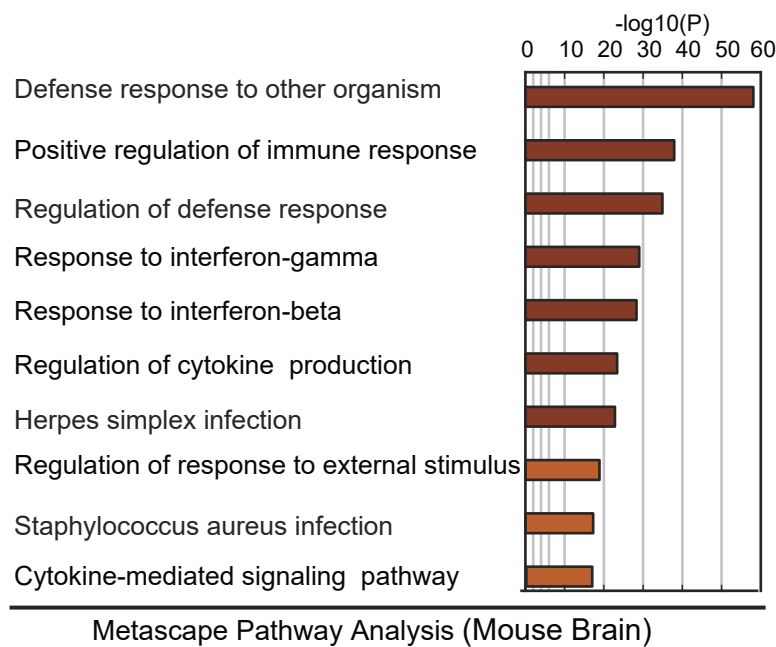

**E**

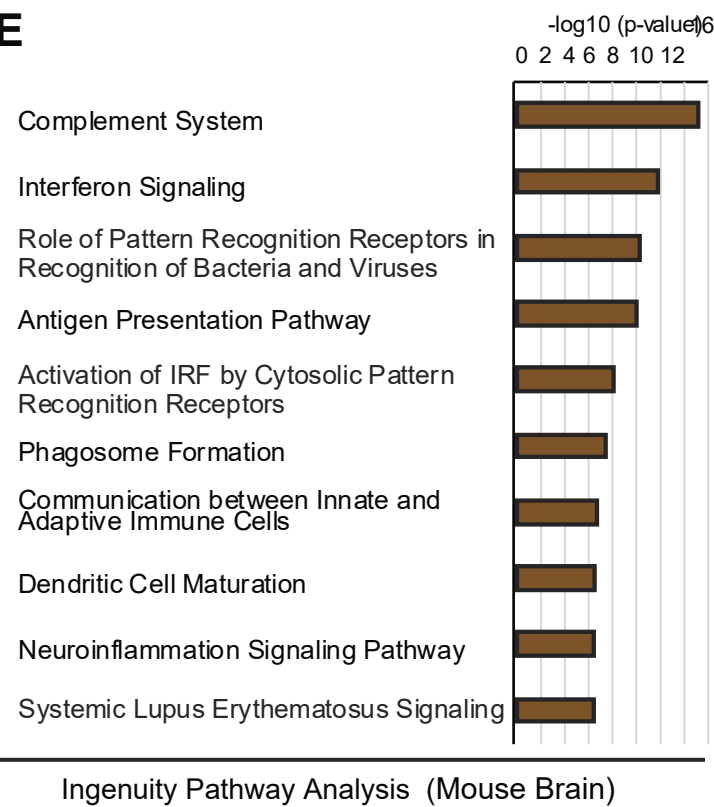

**C**

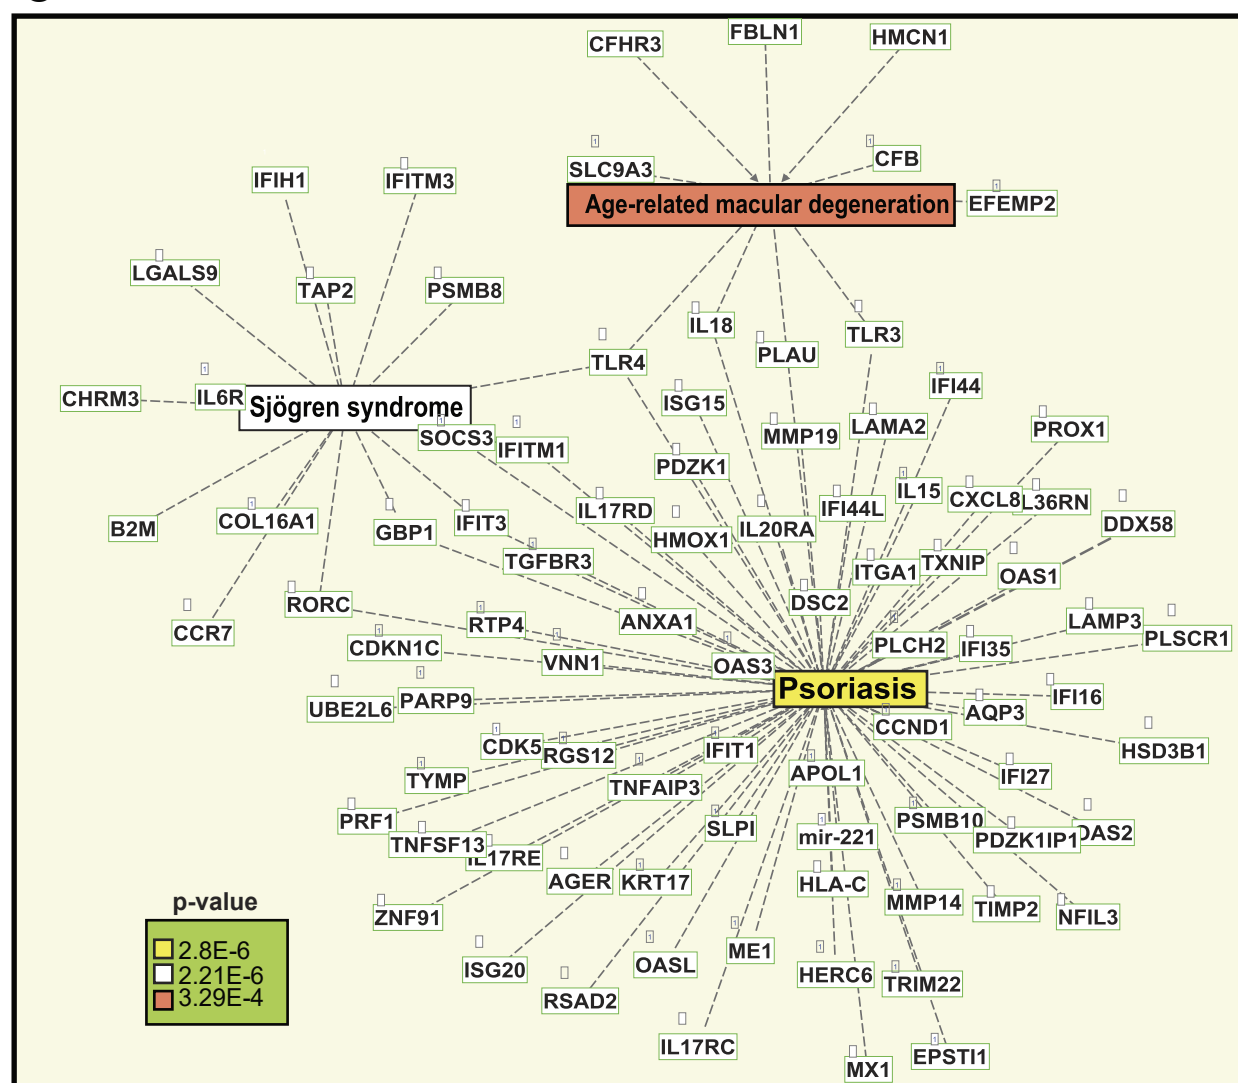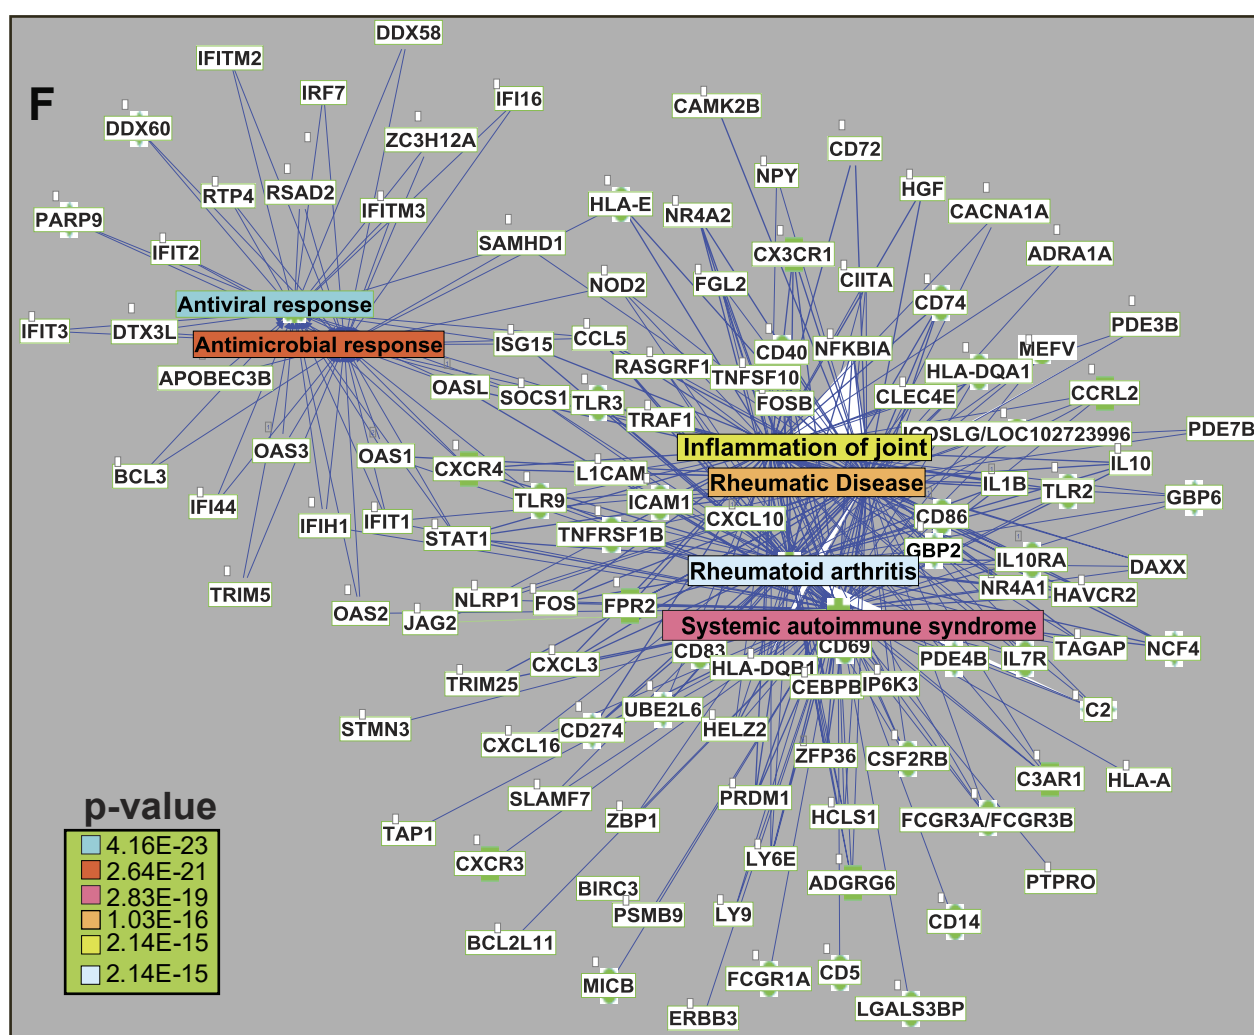

**G**

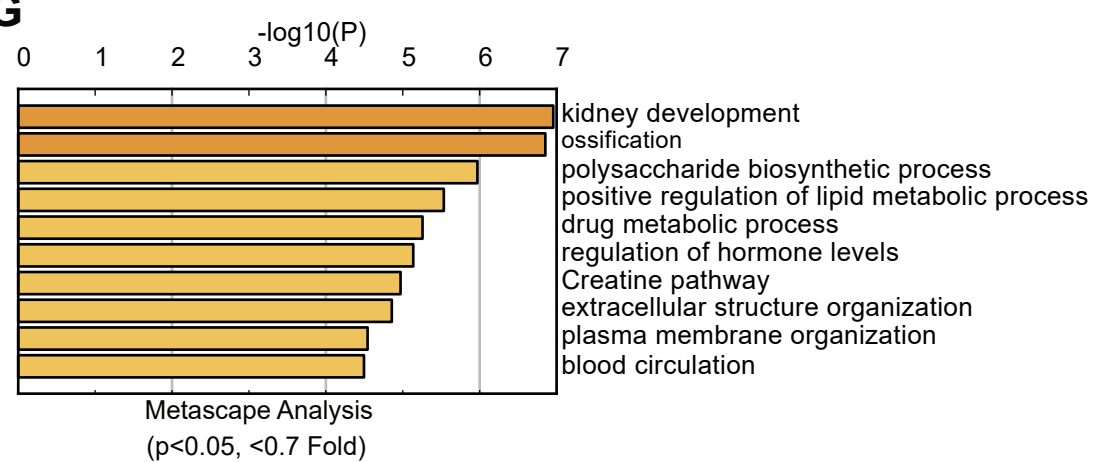

Appendix Figure S1. RNA-seq data depicts that IRGM controls anti-viral and autoimmunity signaling pathways.

(A) IRGM knockdown efficiency analyzed by western blot using cell lysate of HT29 stably expressing control shRNA or IRGM shRNA.

(B) Metascape pathway analysis using sets of genes induced (1.5 fold, p<0.05, (Wald Test), n=3 biological replicates) in IRGM shRNA knockdown HT29 cells compared to control shRNA cells.

(C) Network pathway analysis using IPA. The molecular network of genes connected with diseases associated with genes (1.5 fold, p<0.05 (Wald Test), n=3 mice) upregulated in *Irgm1*<sup>-/-</sup> mice brain. The complete list is documented in Dataset EV2.

(D) Metascape pathway analysis using sets of genes induced (1.5 fold, p<0.05 (Wald Test), n=3 mice) in the brain of *Irgm1*<sup>-/-</sup> knockout mice compared to *Irgm1*<sup>+/+</sup> wild type mice.

(E) Ingenuity pathway analysis using sets of genes induced (1.5 fold, p<0.05 (Wald Test), n=3 mice) in the brain of *Irgm1*<sup>-/-</sup> knockout mice compared to *Irgm1*<sup>+/+</sup> wild type mice.

(F) Network pathway analysis using IPA. The molecular network of genes connected with diseases/function associated with genes (1.5 fold, p<0.05 (Wald Test), n=3 mice) upregulated in *Irgm1* knockout mice BMDM's. The complete list is documented in Dataset EV2.

(G) Bar graph represents top canonical biological pathways upregulated in GO-based metascape pathway analysis using a set of genes repressed (≤ 0.7 fold, p<0.05 (Wald Test), n=3 mice) in *Irgm1* knock-out mice BMDM's compared to wild type mice BMDM's.



# Appendix Figure S2

**A**

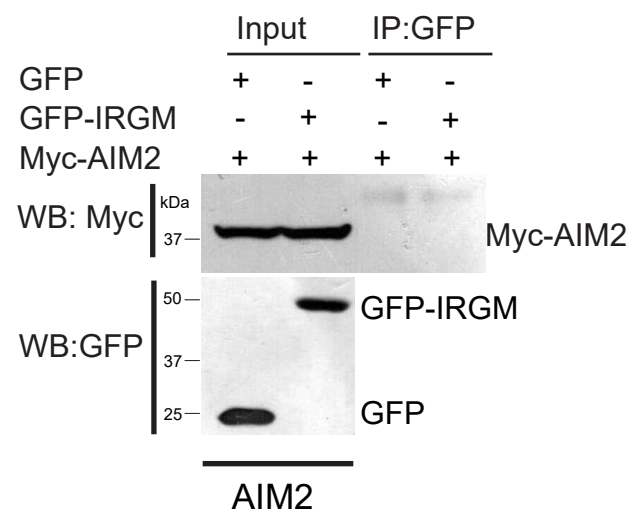

**B**

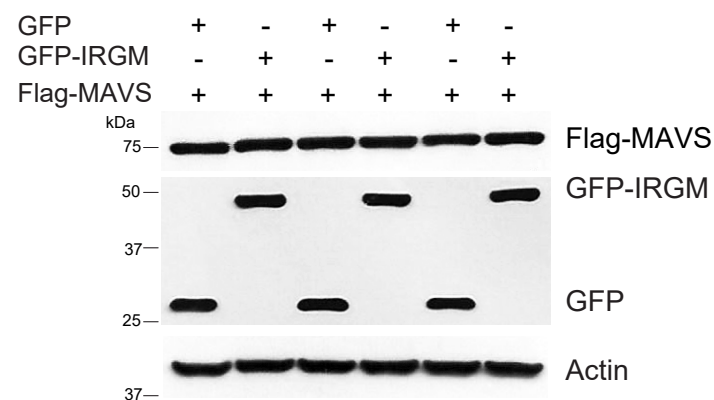

**C**

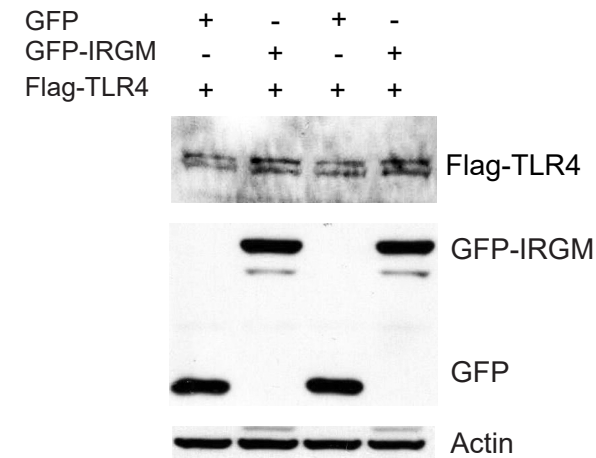

**D**

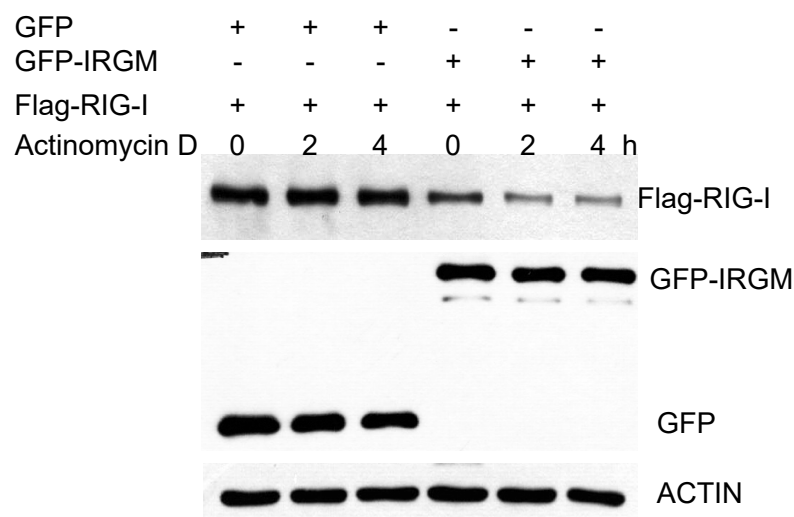

**E**

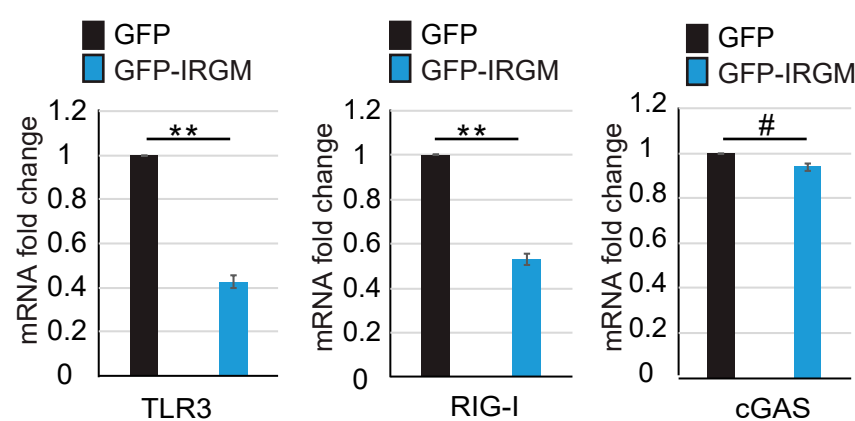

**F**

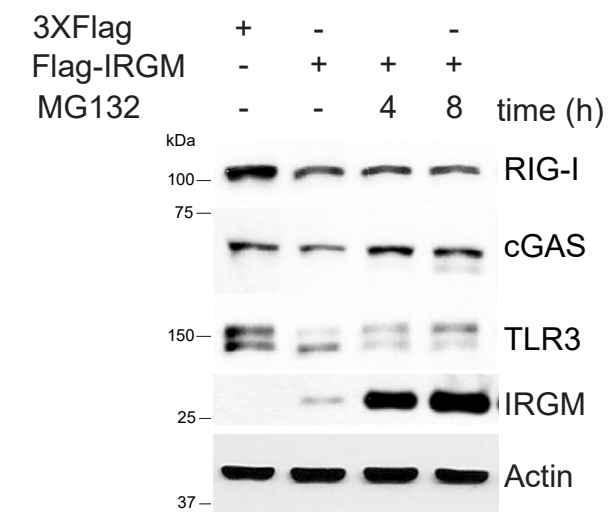

**G**

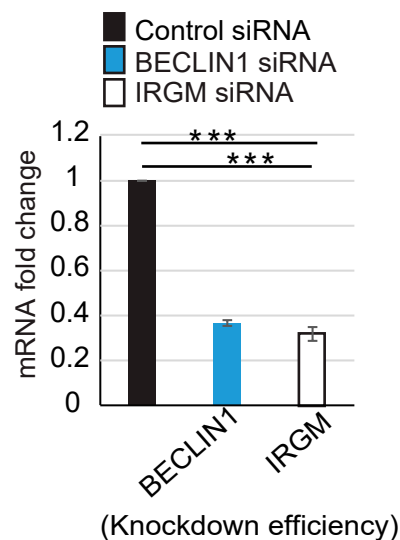

**H**

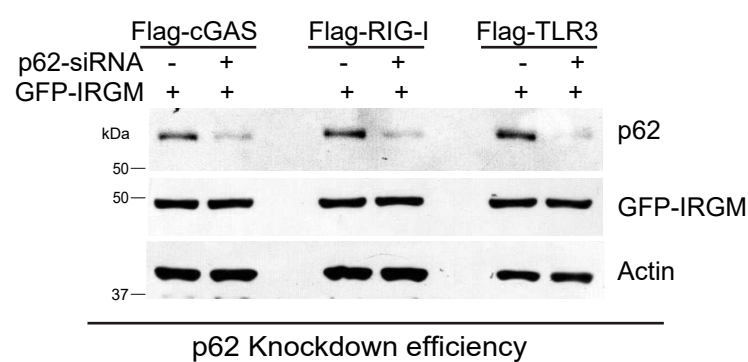

**I**

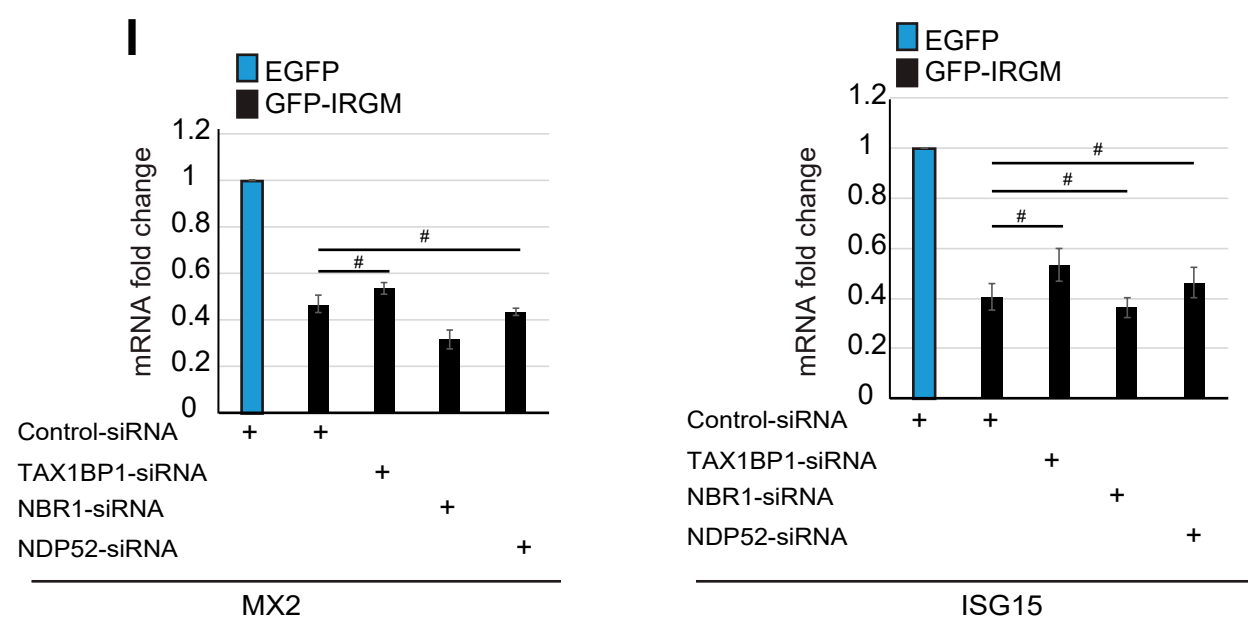

**J**

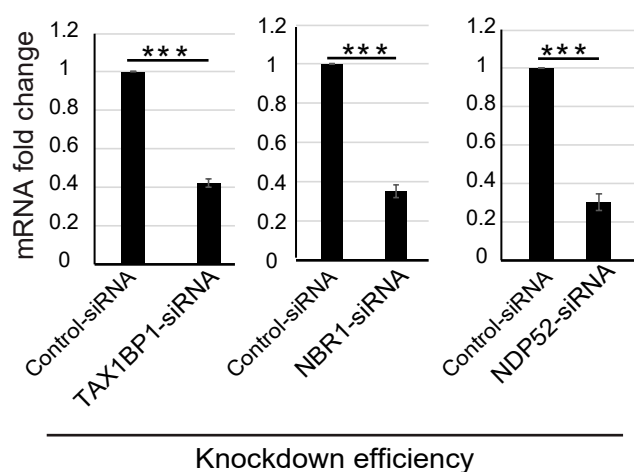

**K**

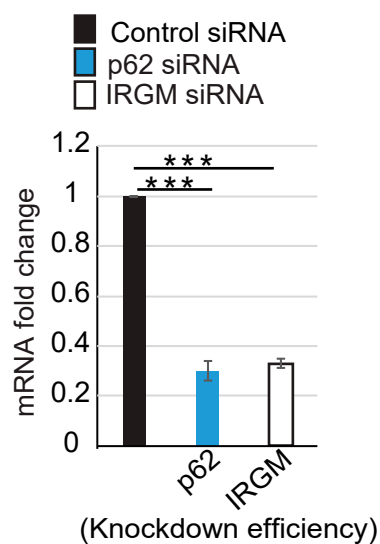

**L**

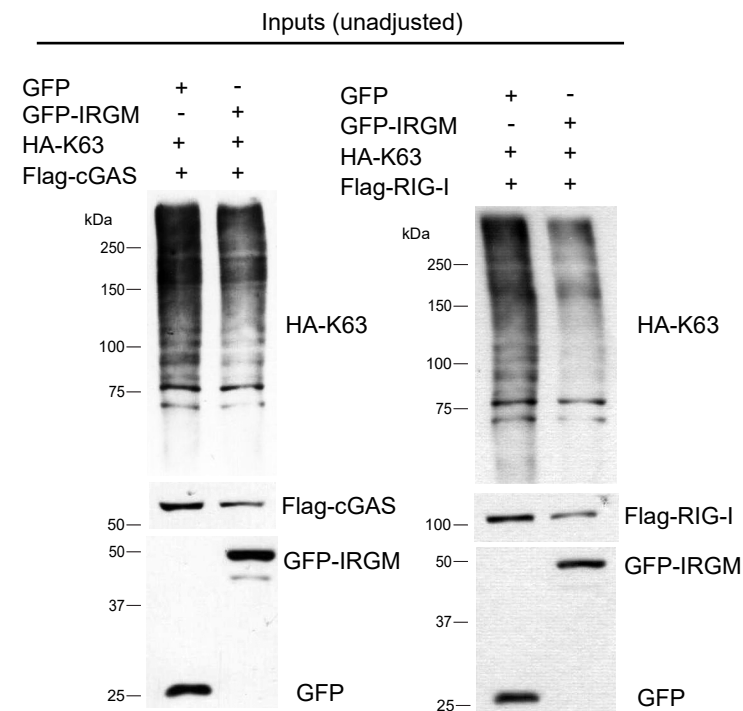

Appendix Figure S2. IRGM interacts and degrades cytoplasmic DNA and RNA sensor proteins to constrain IFN response.

(A) Co-immunoprecipitation (Co-IP) analysis of interaction between GFP-IRGM and Myc-AIM2 in HEK293T cell lysates.

(B) Western blot analysis with lysates of HEK293T cells transiently expressing GFP or GFP-IRGM and Flag-MAVS. (n=3 technical repeats shown)

(C) Western blot analysis with lysates of HEK293T cells transiently expressing GFP or GFP-IRGM and Flag-TLR4. (n=2 technical repeats shown).

(D) Western blot analysis with lysates of HEK293T cells transiently expressing GFP or GFP-IRGM and Flag RIG-I and treated with Actinomycin-D (5µg/ml, 0 h, 2 h and 4 h).

(E) qRT-PCR analysis with total RNA isolated from THP-1 cells transiently transfected with GFP and GFP-IRGM as indicated. Mean ± SD, n = 3 (biological replicates), \*\*p < 0.005, Student's unpaired t-test. #p = Non significant.

(F) Control and HT29 cells stably expressing Flag IRGM were treated with MG132 (20 µM, 4 h and 8 h) and were subjected to immunoblotting with the indicated antibodies.

(G) qRT-PCR analysis with total RNA isolated from THP-1 cells transfected with control siRNA or BECLIN1 siRNA or IRGM siRNA as indicated. Mean ± SD, n = 3 (biological replicates), \*\*\*p < 0.0005, Student's unpaired t-test.

(H) Western blot analysis of control and p62 siRNA transfected HEK-293T cell lysates transiently expressing GFP-IRGM and probed with indicated antibodies.

(I) qRT-PCR analysis with RNA isolated from control siRNA, TAX1BP1 siRNA, NBR1 siRNA or NDP52 siRNA transfected THP-1 cells expressing EGFP or GFP-IRGM as indicated. Mean ± SD, n = 3 (biological replicates), #p = Non significant, Student's unpaired t-test.

(J) qRT-PCR analysis with RNA isolated from control siRNA, TAX1BP1 siRNA, NBR1 siRNA or NDP52 siRNA transfected THP-1 cells. Mean ± SD, n = 3 (biological replicates), \*\*\*p < 0.0005, Student's unpaired t-test.

(K) qRT-PCR analysis with total RNA isolated from THP-1 cells transfected with control siRNA or p62 siRNA or IRGM siRNA as indicated. Mean ± SD, n = 3 (biological replicates), \*\*\*p < 0.0005, Student's unpaired t-test.

(L) Western blot analysis of Input samples (Unadjusted-1:1 ratio) from Co-immunoprecipitation (Co-IP) experiment of the ubiquitination of Flag-cGAS or Flag-RIG-I in the presence of EGFP or GFP-IRGM and probed with indicated antibodies.



# Appendix Figure S3

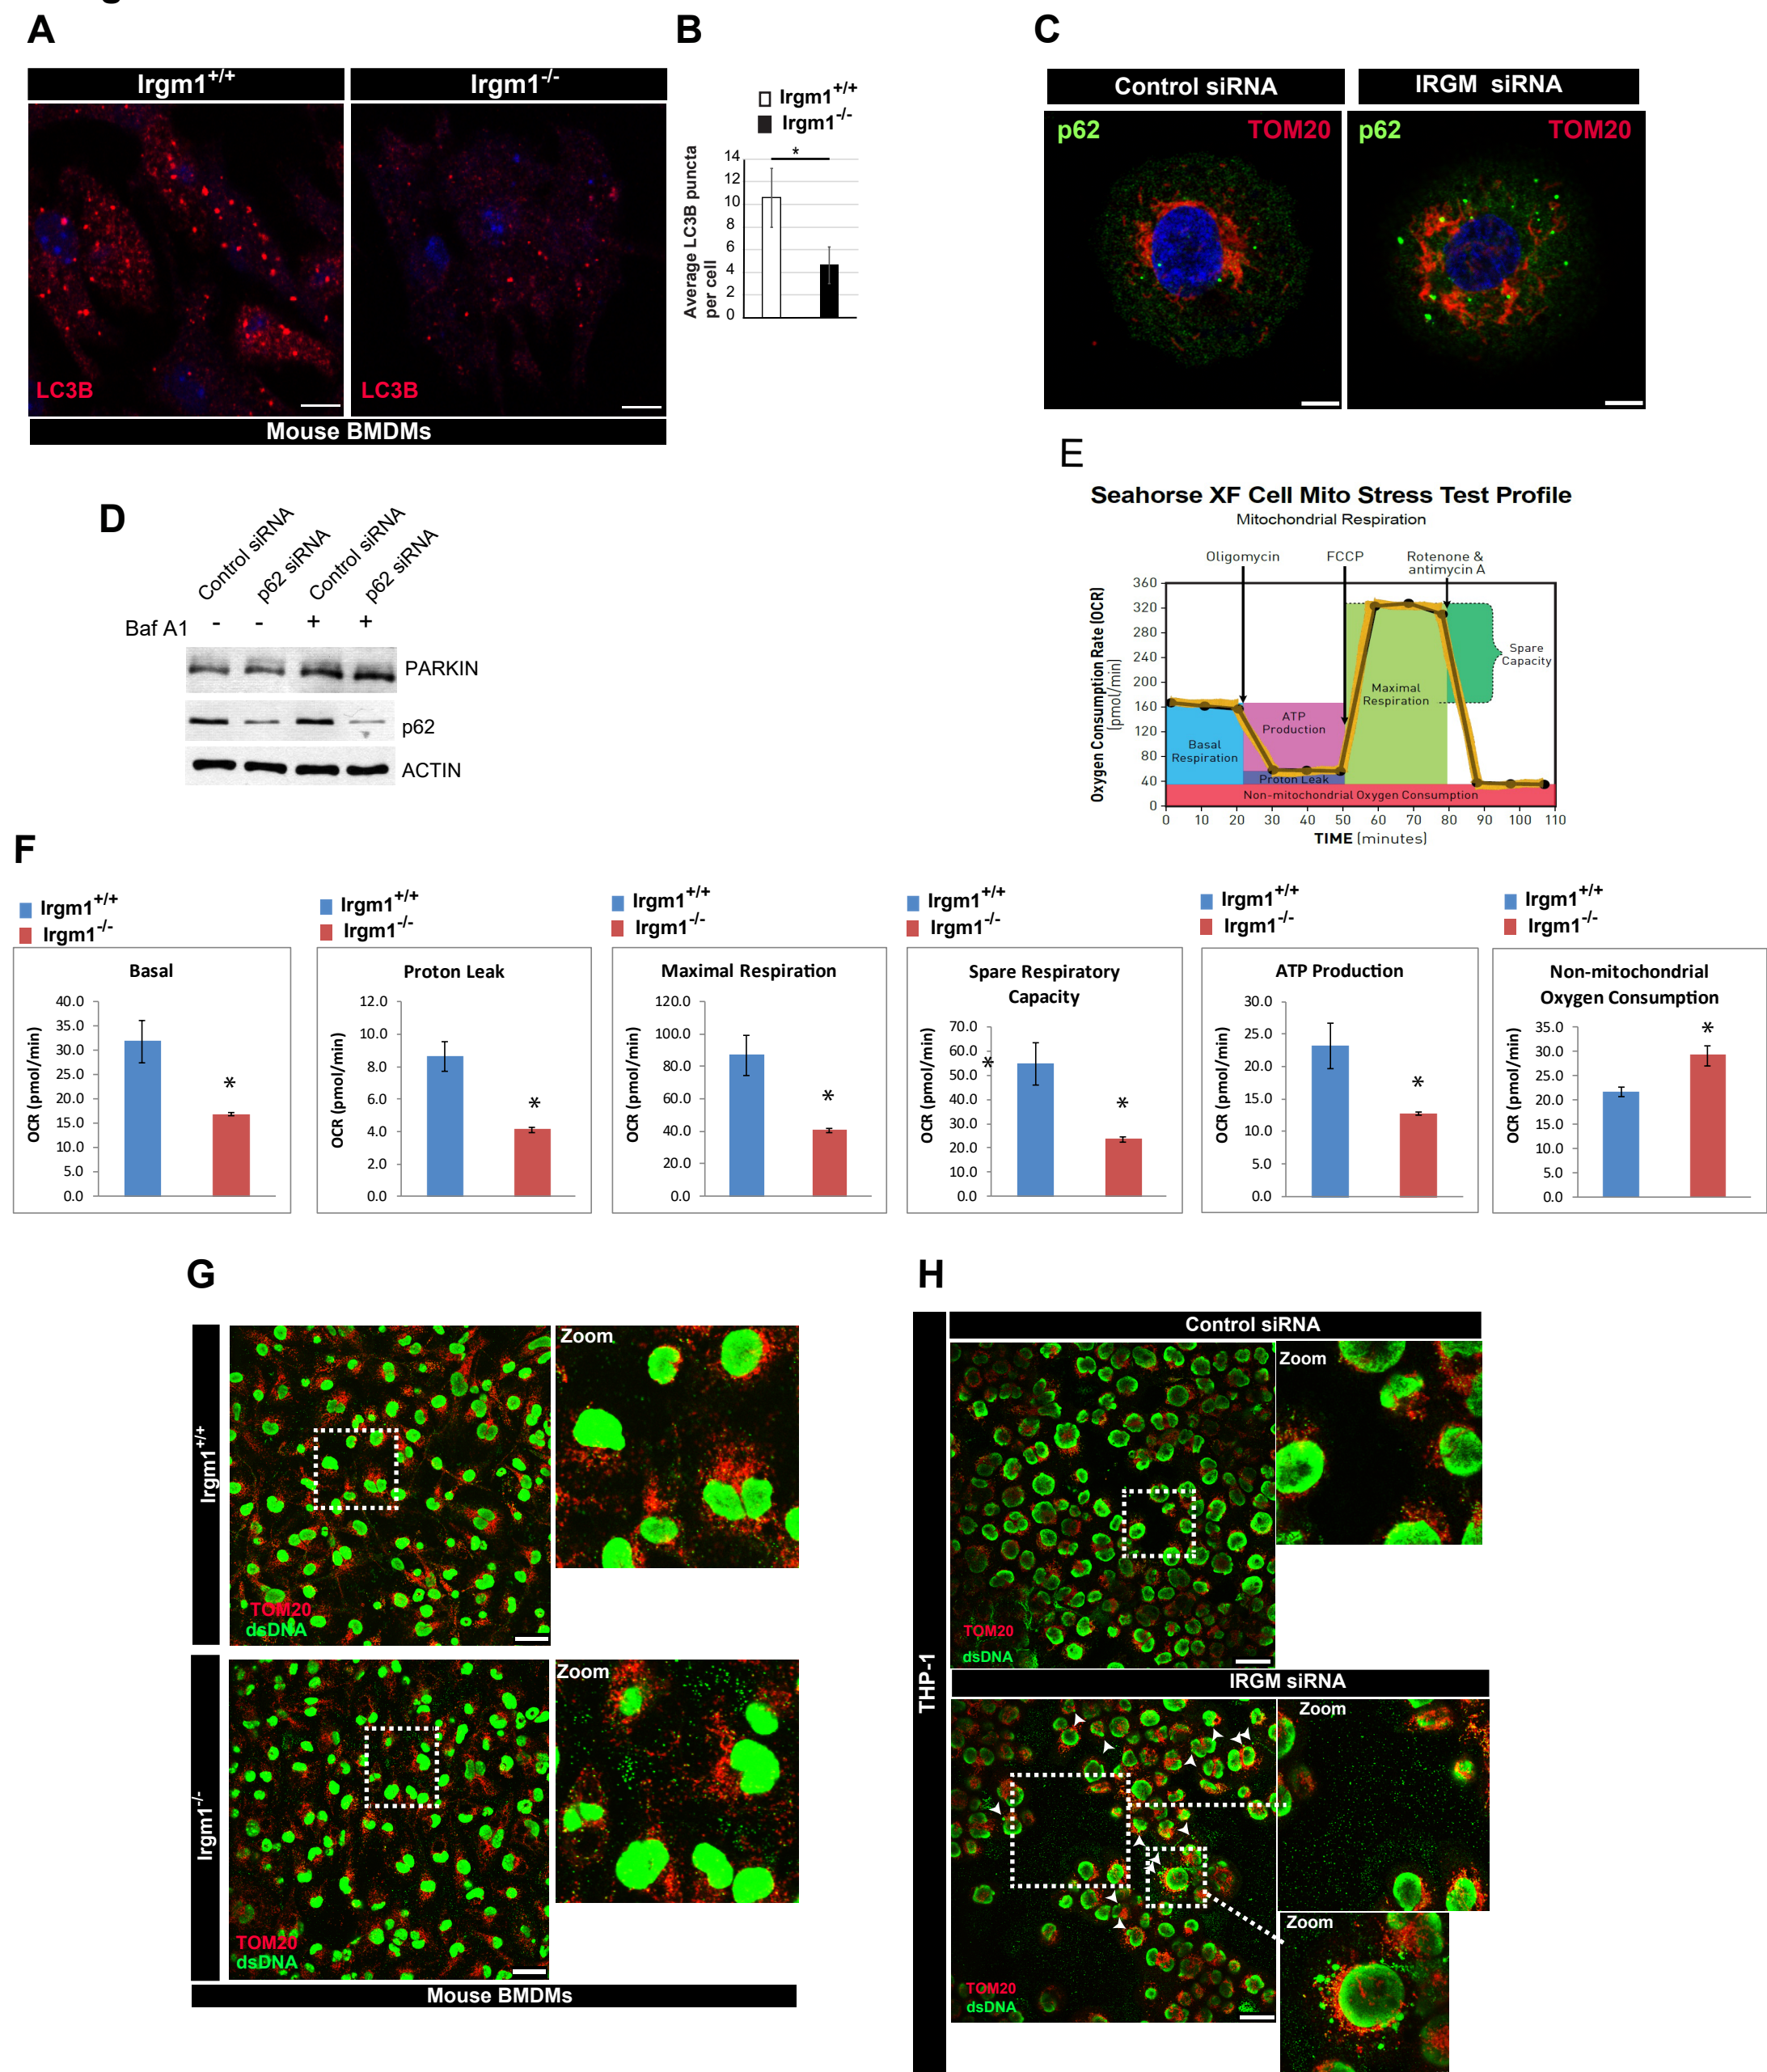

Appendix Figure S3. IRGM depletion results in defective mitophagy and enhanced cytosolic DAMPs.

(A) Representative confocal images of Irgm1<sup>+/+</sup> and Irgm1<sup>-/-</sup> mice BMDMs immunostained with LC3B (red) antibody. The panels show LC3B puncta. Scale bar, 10  $\mu$ m.

(B) Bar diagram showing average LC3B puncta in Irgm1<sup>+/+</sup> and Irgm1<sup>-/-</sup> mice BMDMs. (n = 3 (biological replicates), mean  $\pm$  SD, \*p  $\leq$  0.05, Student's unpaired t-test).

(C) Representative confocal images of control siRNA and p62 siRNA transfected THP-1 cells, immunostained with p62 (green) and TOM20 (red) antibodies. Scale bar, 3  $\mu$ m.

(D) Western blot analysis of control siRNA and IRGM siRNA transfected THP-1 cells untreated or treated with Bafilomycin A1 (300 nM, 4 h), probed with indicated antibodies.

(E-F) Seahorse XF Cell mito stress test for analysis of mitochondrial function in Irgm1<sup>+/+</sup> and Irgm1<sup>-/-</sup> mice BMDM cells. The experiments were performed using the XF24 extracellular flux analyzer. (E) The standard Seahorse XF Cell mito stress test profile and, (F) The contribution of associated parameters including basal oxygen consumption, proton leak, maximal oxygen consumption, spare respiration capacity, ATP-linked oxygen consumption, and non-mitochondrial oxygen consumption was plotted, respectively. Results shown represent mean  $\pm$  standard error (n = 3 (biological replicates), mean  $\pm$  SD, \*p  $\leq$  0.05, Student's unpaired t-test).

(G) Representative confocal images of Irgm1<sup>+/+</sup> and Irgm1<sup>-/-</sup> mice BMDMs immunostained with dsDNA (green) and TOM20 (red) antibodies. The Irgm1<sup>-/-</sup> zoom panels show extracellular DNA in cytoplasm. Scale bar, 25  $\mu$ m. Zoom panels are digital magnifications.

(H) Representative confocal images of control siRNA and IRGM siRNA transfected THP-1 cells immunostained with dsDNA (green) and TOM20 (red) antibodies. The zoom panels show extracellular DNA and cytoplasmic micronuclei. The white arrows in IRGM siRNA panel depict the micronuclei. Scale bar, 25  $\mu$ m. Zoom panels are digital magnifications.



# Appendix Figure S4

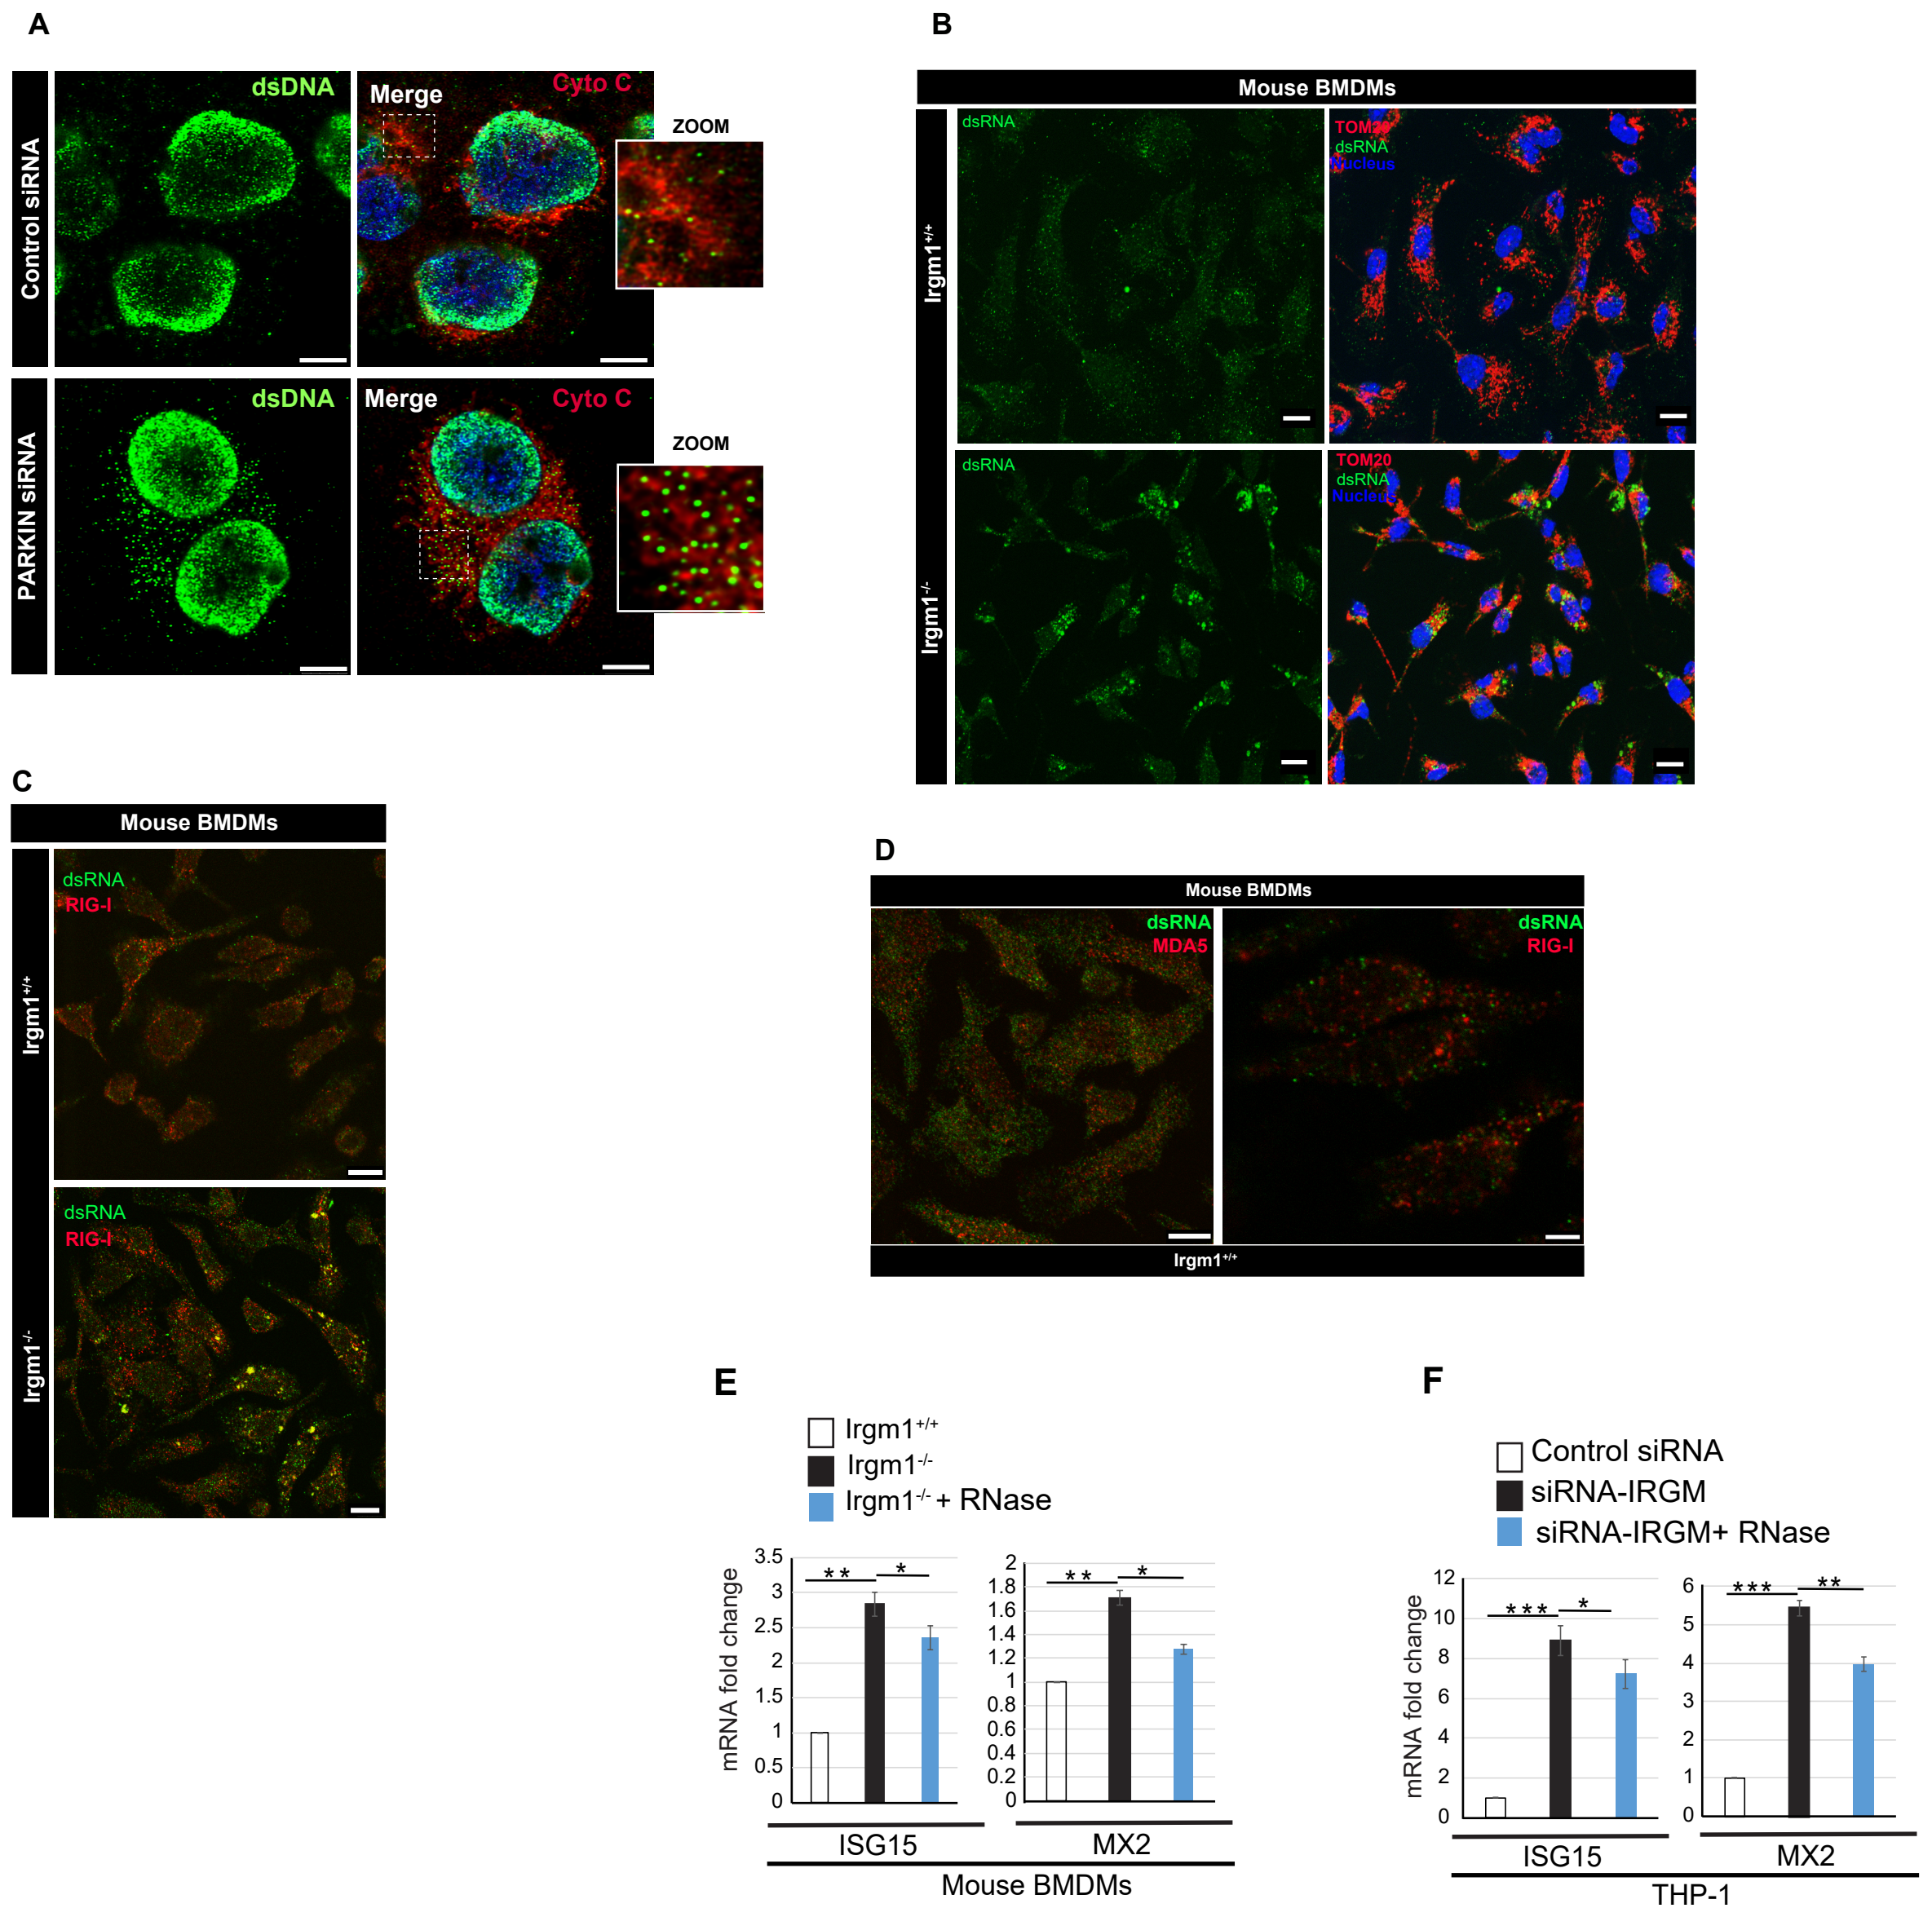

Appendix Figure S4. Cytosolic DAMPs in IRGM-depleted cells invoke nucleic acid-sensing pathway for activation of IFN response.

(A) Representative confocal images of control siRNA and PARKIN siRNA transfected THP-1 cells immunostained with dsDNA (green) and Cytochrome C (red) antibodies. The zoom panels show cytosolic dsDNA. Scale bar, 5  $\mu$ m. Zoom panels are digital magnifications.

(B) Representative confocal images of Irgm1<sup>+/+</sup> and Irgm1<sup>-/-</sup> mice BMDMs immunostained with dsRNA (green) and TOM20 (red) antibodies. Scale bar, 5  $\mu$ m.

(C) Representative confocal images of Irgm1<sup>+/+</sup> and Irgm1<sup>-/-</sup> mice BMDMs immunostained with dsRNA (green) and RIG-I (red) antibodies. Scale bar, 8  $\mu$ m.

(D) Representative confocal images of Irgm1<sup>+/+</sup> mice BMDMs immunostained with dsRNA (green) and Mda5 (red) or RIG-I (red) antibodies. Right panel, Scale bar, 8  $\mu$ m; Left panel, Scale bar, 3  $\mu$ m.

(E) The qRT-PCR analysis with RNA isolated from Irgm1<sup>+/+</sup> and Irgm1<sup>-/-</sup> mice BMDMs electroporated with RNase III and H (10 unit for 1hr) as indicated. (n = 3 (biological replicates), mean  $\pm$  SD, \*p  $\leq$  0.05, \*\*p  $\leq$  0.005, Student's unpaired t-test).

(F) The qRT-PCR analysis with RNA isolated from control and IRGM siRNA knockdown THP-1 cells electroporated with RNase III and H (10 unit for 1hr) as indicated. (n = 3 (technical replicates), mean  $\pm$  SD, \*p  $\leq$  0.05, \*\*p  $\leq$  0.005, \*\*\*p  $<$  0.0005, Student's unpaired t-test).

# Appendix Figure S5

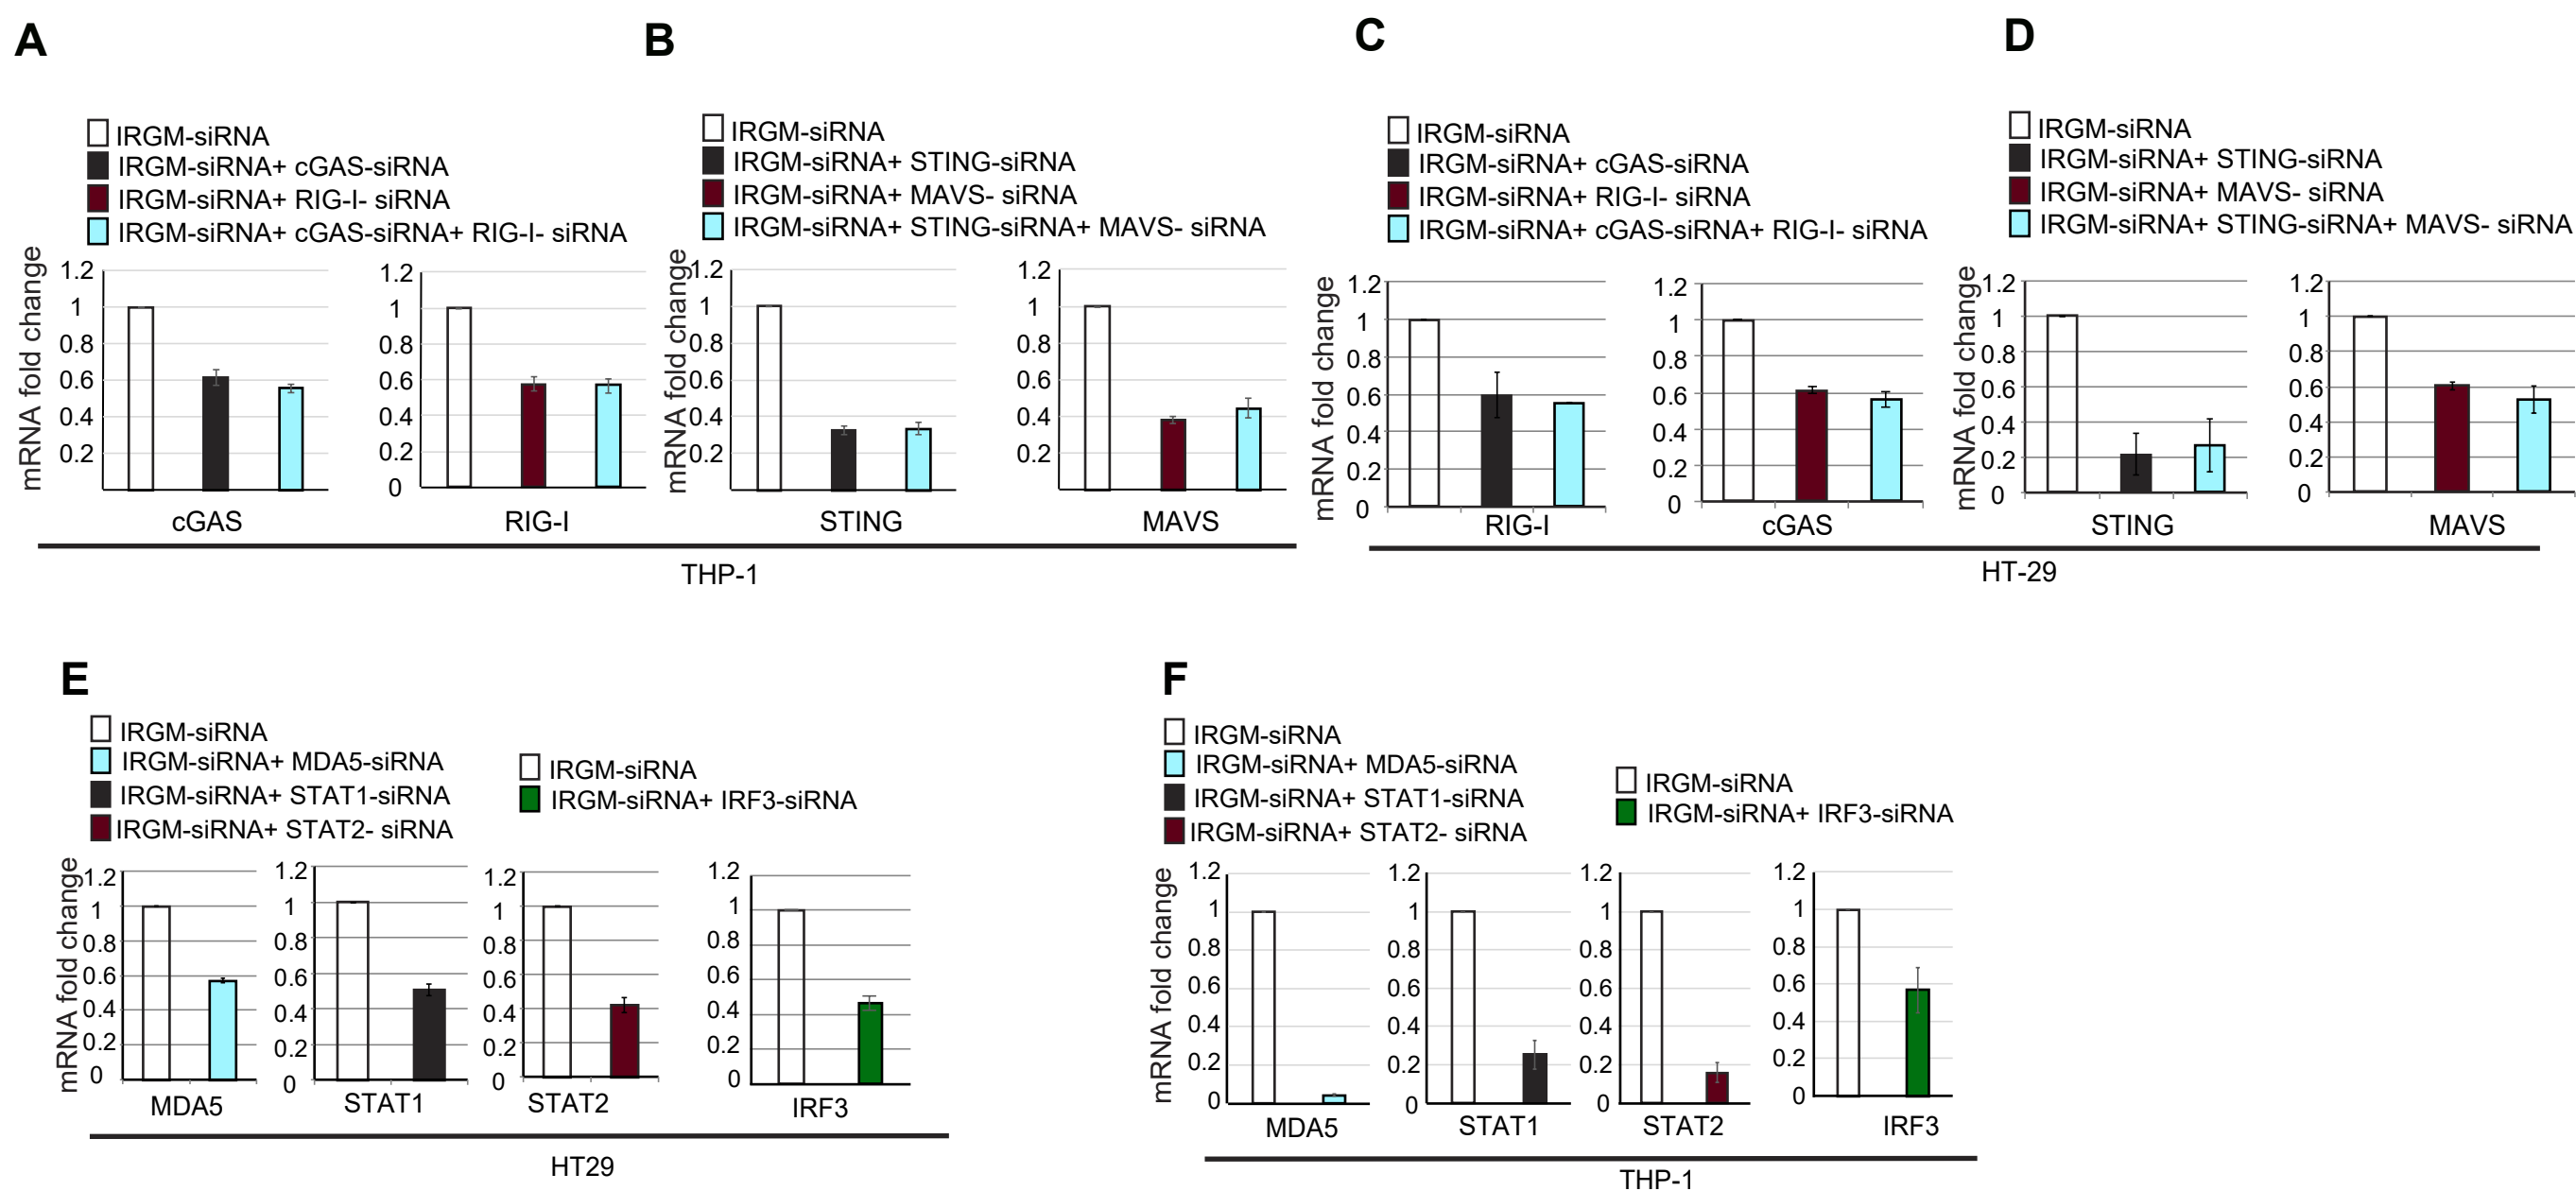

Appendix Figure S5.

(A-B) Control and IRGM knock down THP-1 cells were transfected with indicated siRNA and total RNA was subjected to qRT PCR with (A) cGAS and RIG-I primers (B) STING and MAVS primers. (n=2, technical replicates, mean  $\pm$  SD)

(C-D) Control and IRGM knock down HT-29 cells were transfected with indicated siRNA and total RNA was subjected to qRT PCR with (C) RIG-I and cGAS primers (D) STING and MAVS primers. (n=2, technical replicates, mean  $\pm$  SD)

(E) Control and IRGM knock down HT-29 cells were transfected with indicated siRNA and total RNA was subjected to qRT PCR with MDA5, STAT1, STAT2, and IRF3 primers. (n=2, technical replicates, mean  $\pm$  SD)

(F) Control and IRGM knock down THP-1 cells were transfected with indicated siRNA and total RNA was subjected to qRT PCR with MDA5, STAT1, STAT2, and IRF3 primers. (n=2, technical replicates, mean  $\pm$  SD)



Appendix Table S1

Primer sequence for qRT PCR are as follows:

qRT primers:

|                            |                          |
|----------------------------|--------------------------|
| Mouse Mx1 Forward          | AGGCAGTGGTATTGTCACCA     |
| Mouse Mx1 Reverse          | AGACTTTGCCTCTCCACTCC     |
| Mouse Mx2 Forward          | AGGCAGTGGTATTGTCACCA     |
| Mouse Mx2 Reverse          | AGACTTTGCCTCTCCACTCC     |
| Mouse Rig I(Ddx58) Forward | CATTCTCTATGAGTACGTGGGC   |
| Mouse Rig I(Ddx58) Reverse | ACTTGCTATCTCGTGCTCTTC    |
| Mouse cGas Forward         | GTGAATCTTCCGGAGCAAATG    |
| Mouse cGas Reverse         | ACATGTGAAAGATGGCAGTTTT   |
| Mouse Mda5 (Ifih1) Forward | TCTGGAGAGTGGAGACGATG     |
| Mouse Mda5 (Ifih1) Reverse | GCCTCCTTGTTGGTGTGATG     |
| Mouse Ifi7 Forward         | TTGATCCGCATAAGGTGTACG    |
| Mouse Ifi7 Reverse         | TTCCCTATTTTCCGTGGCTG     |
| Mouse Stat1 Forward        | CCAAAGGAAGCACCAGAACC     |
| Mouse Stat 1 Reverse       | GGGTGGACTTCAGACACAGA     |
| Mouse Stat 2 Forward       | CAAGCTGGACGAGTGGAAG      |
| Mouse Stat 2 Reverse       | CGAAGGTGGAACAAGAACTTTG   |
| Mouse Apobec3 Forward      | CTGCTAAGCGAGAAAGGCAA     |
| Mouse Apobec3 Reverse      | CAGGTGAGGTAGCAGGTGAT     |
| Mouse Oas1a Forward        | AGGTGGAGTTTGATGTGCTG     |
| Mouse Oas1a Reverse        | GTAGAGAACTCGCCATCCTTC    |
| Mouse Ifn beta Forward     | GCACTACAGGCTCCGAGATGAAC  |
| Mouse Ifn beta Reverse     | TTGTGCTTGCTTGGTTCTCCTTGT |
| Mouse Isg15 Forward        | GAGAGCAAGCAGCCAGAAG      |
| Mouse Isg15 Reverse        | CCCAGGCCATTGCTGCAGGC     |
| Human RIG I(DDX58) Forward | TGTTACACAGCTGACGTAAGAG   |
| Human RIG I(DDX58) Reverse | TGTCGGGCACAGAATATCTTTG   |
| Human MDA5(IFIH1) Forward  | TGTCCAAGAGTTAACAGGCTC    |

|                           |                           |
|---------------------------|---------------------------|
| Human MDA5(IFIH1) Reverse | GATTTGGCTGAACTGTGGTTG     |
| Human OAS1 Forward        | GAAAGGTGCTTCCGAGGTAG      |
| Human OAS1 Reverse        | GGACTGAGGAAGACAACCAG      |
| Human MX1 Forward         | CCAGTAATGTGGACATCGCC      |
| Human MX1 Reverse         | CTTGTCTTCAGTTCCTTTGTCC    |
| Human MX2 Forward         | ACTGGCAGAAAGACTTACCAC     |
| Human MX2 Reverse         | GGCTCTCCCTTATTTGTCCTTC    |
| Human ISG20 Forward       | GAGATCACCGATTACAGAACCC    |
| Human ISG20 Reverse       | ACCAGCTTGCCTTTCAGG        |
| Human ISG15 Forward       | ACTCATCTTTGCCAGTACAGG     |
| Human ISG15 Reverse       | CCAGCATCTTCACCGTCAG       |
| Human STAT1 Forward       | GCCTCCATCCTTTGGTACAAC     |
| Human STAT1 Reverse       | TTCTGAAAGCTGAGCCCATC      |
| Human STAT2 Forward       | ACCCCTCATCCTCAAGACT       |
| Human STAT2 Reverse       | AGTGACTCATTGCCTTCCTG      |
| Human TRIM 22 Forward     | GCACGCTCATCTCAGATCTC      |
| Human TRIM 22 Reverse     | TCAATGTCCAGCTTTCACTCC     |
| Human APOBEC3G Forward    | CTGTGTTATGAGGTGGAGCG      |
| Human APOBEC3G Reverse    | GAAACCGTGTTTATGTGGAGC     |
| Human p62 Forward         | AGCTGCCTTGTACCCACATC      |
| Human p62 Reverse         | CAGAGAAGCCCATGGACAG       |
| Human TAX1BP1 Forward     | GACCAAAGAAATTGCTGACAAAAC  |
| Human TAX1BP1 Reverse     | GCAATTTTCACTTGTTCTTTCCATT |
| Human NBR1 Forward        | AGGTATCCATCAACAGTCAAGG    |
| Human NBR1 Reverse        | TCGTTTTGCTCCTACAACCTGG    |
| Human NDP52 Forward       | TGGGTCTGGATTTTAATTCTTTGC  |
| Human NDP52 Reverse       | ATTTCTTGATGGAGAGCGGG      |
