# Supplementary material for: Autoimmunity gene IRGM suppresses cGAS‐STING and RIG‐I‐MAVS signaling to control interferon response
Source: PubMed Central journal article supplement (PMC7507369; doi:10.15252/embr.202050051), 2020-07-27

Figure 4

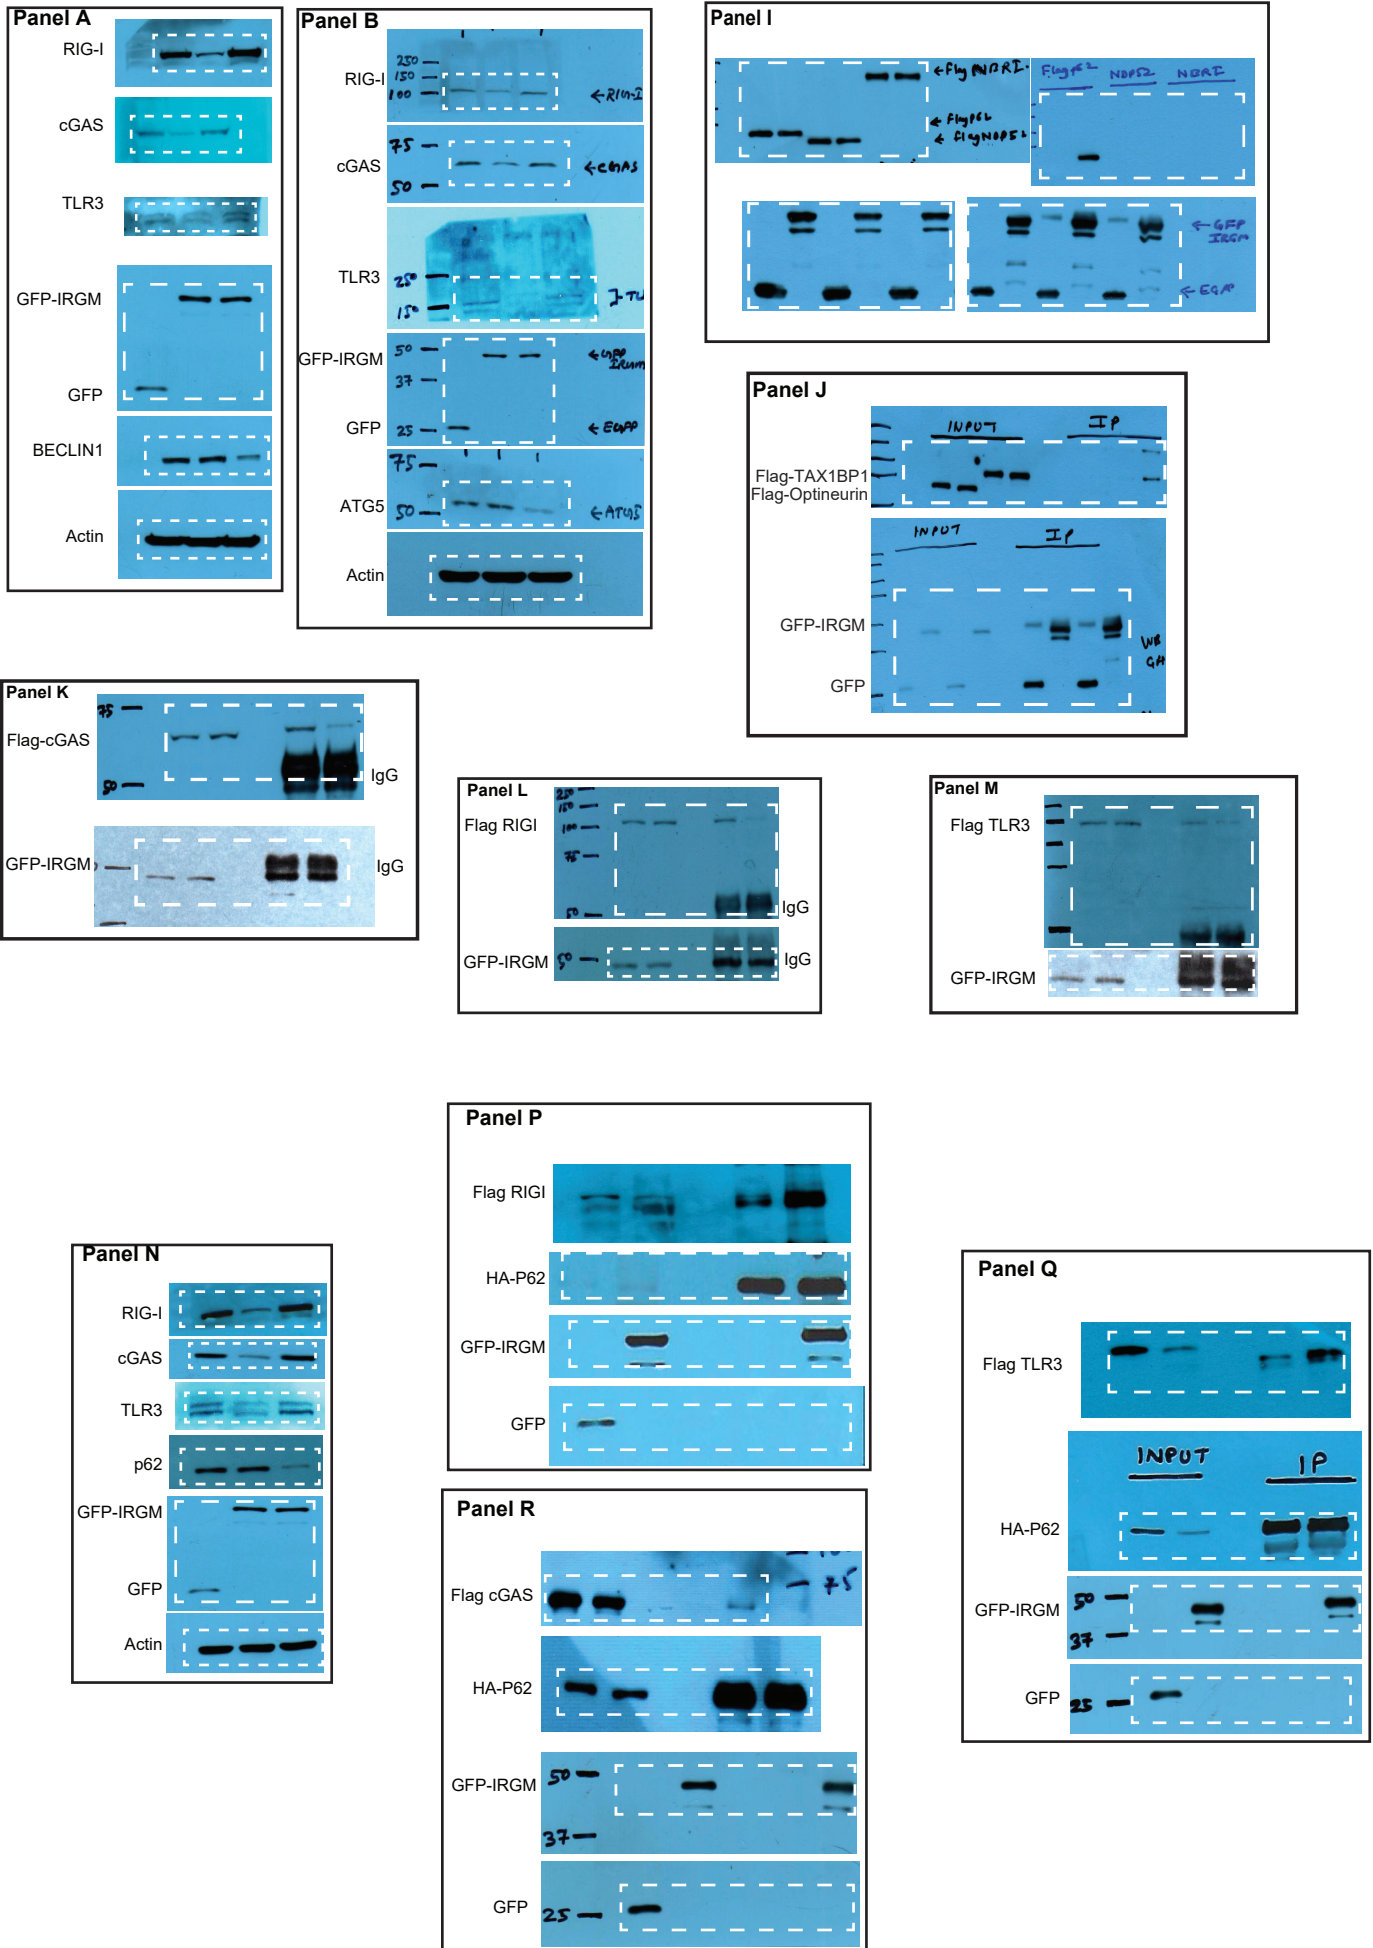

Supplement: EMBR-21-e50051-s007.pdf [file EMBR-21-e50051-s007.pdf]
